# Supplementary material for: Precise control of density and strength of acid sites of MFI-type zeolite nanoparticles via simultaneous isomorphous substitution by Al and Fe
Source: Royal Society of Chemistry journal article supplement (doi:10.1039/d0ce01031f), 2020-01-01
Supplement: d0ce01031f1.pdf [file d0ce01031f1.pdf]

## Electronic Supplementary Information

### Precise control of density and strength of acid sites of MFI-type zeolite nanoparticles via simultaneous isomorphous substitution by Al and Fe

Mizuho Yabushita,<sup>\*,†,a</sup> Hiroki Kobayashi,<sup>a</sup> Atsushi Neya,<sup>a</sup> Masafumi Nakaya,<sup>a</sup> Sachiko Maki,<sup>a</sup>  
Masaki Matsubara,<sup>a,b</sup> Kiyoshi Kanie<sup>a</sup> and Atsushi Muramatsu<sup>\*,a,c</sup>

<sup>a</sup>*Institute of Multidisciplinary Research for Advanced Materials, Tohoku University, 2-1-1 Katahira, Aoba-ku, Sendai, Miyagi 980-8577, Japan*

<sup>b</sup>*National Institute of Technology, Sendai College, 48 Nodayama, Medeshima-Shiote, Natori, Miyagi 981-1239, Japan*

<sup>c</sup>*Core Research for Evolutional Science and Technology, Japan Science and Technology Agency, 4-1-8 Honcho, Kawaguchi, Saitama 332-0012, Japan*

*\*Corresponding authors: m.yabushita@tohoku.ac.jp (M.Y.); mura@tohoku.ac.jp (A.M.)*

*†Present address: Department of Applied Chemistry, School of Engineering, Tohoku University, Aoba 6-6-07, Aramaki, Aoba-ku, Sendai, Miyagi 980-8579, Japan*

## Table of Contents

|                                    |                                                                                                                                                                                                                  |     |
|------------------------------------|------------------------------------------------------------------------------------------------------------------------------------------------------------------------------------------------------------------|-----|
| 1. Fig. S1                         | N <sub>2</sub> physisorption isotherms of the synthesized MFI zeolites. ....                                                                                                                                     | S3  |
| 2. Fig. S2                         | Parametric plot of external surface area determined by the <i>t</i> -plot method<br>as a function of the crystallite size.....                                                                                   | S4  |
| 3. Fig. S3                         | <sup>27</sup> Al MAS NMR spectra of the synthesized MFI zeolites. ....                                                                                                                                           | S5  |
| 4. Fig. S4                         | NH <sub>3</sub> -TPD profiles of the synthesized MFI zeolites.....                                                                                                                                               | S6  |
| 5. Fig. S5                         | Parametric plot of apparent $\Delta H_{\text{NH}_3}$ for a physical mixture of A50F0 and A0F50<br>at the different mixing ratios as a function of the proportion of Al in the total<br>amount of Al and Fe. .... | S7  |
| 6. Fig. S6                         | DRIFT spectra of the [Al, Fe]-MFI zeolites.....                                                                                                                                                                  | S7  |
| 7. Fig. S7                         | Detailed data of the DTO reaction using A50F0. ....                                                                                                                                                              | S8  |
| 8. Fig. S8                         | Detailed data of the DTO reaction using A100F0. ....                                                                                                                                                             | S8  |
| 9. Fig. S9                         | Detailed data of the DTO reaction using A200F0. ....                                                                                                                                                             | S9  |
| 10. Fig. S10                       | Detailed data of the DTO reaction using A400F0. ....                                                                                                                                                             | S9  |
| 11. Fig. S11                       | Detailed data of the DTO reaction using A0F50. ....                                                                                                                                                              | S10 |
| 12. Fig. S12                       | Detailed data of the DTO reaction using A0F100. ....                                                                                                                                                             | S10 |
| 13. Fig. S13                       | Detailed data of the DTO reaction using A50F50. ....                                                                                                                                                             | S11 |
| 14. Fig. S14                       | Detailed data of the DTO reaction using A100F50. ....                                                                                                                                                            | S11 |
| 15. Fig. S15                       | Detailed data of the DTO reaction using A200F50. ....                                                                                                                                                            | S12 |
| 16. Fig. S16                       | Detailed data of the DTO reaction using A400F50. ....                                                                                                                                                            | S12 |
| 17. Fig. S17                       | Detailed data of the DTO reaction using A800F50. ....                                                                                                                                                            | S13 |
| 18. Fig. S18                       | Detailed data of the DTO reaction using A100F100. ....                                                                                                                                                           | S13 |
| 19. Fig. S19                       | Detailed data of the DTO reaction using A150F75. ....                                                                                                                                                            | S14 |
| 20. Fig. S20                       | Detailed data of the DTO reaction using A300F150. ....                                                                                                                                                           | S14 |
| 21. Table S1                       | Ratios of propene to ethene produced in the DTO reaction .....                                                                                                                                                   | S15 |
| 22. Table S2                       | Reported catalysts for the DTO reactions.....                                                                                                                                                                    | S16 |
| 23. Fig. S21                       | Differences of catalyst lifetime in the DTO reactions between [Al, Fe]-MFI and<br>a physical mixture of A50F0 and A0F50 at the various Al/(Al + Fe) values. ....                                                 | S17 |
| 24. Fig. S22                       | Recycle test of A200F50 for the DTO reaction.....                                                                                                                                                                | S17 |
| 25. Fig. S23                       | Detailed data of the second run of the DTO reaction using A200F50. ....                                                                                                                                          | S18 |
| 26. Fig. S24                       | Detailed data of the third run of the DTO reaction using A200F50. ....                                                                                                                                           | S18 |
| 27. Fig. S25                       | Differences of the nature of Fe species involved in the fresh A200F50 catalyst<br>and the one after the third run of recycle test. ....                                                                          | S19 |
| 28. Supplementary references ..... |                                                                                                                                                                                                                  | S19 |

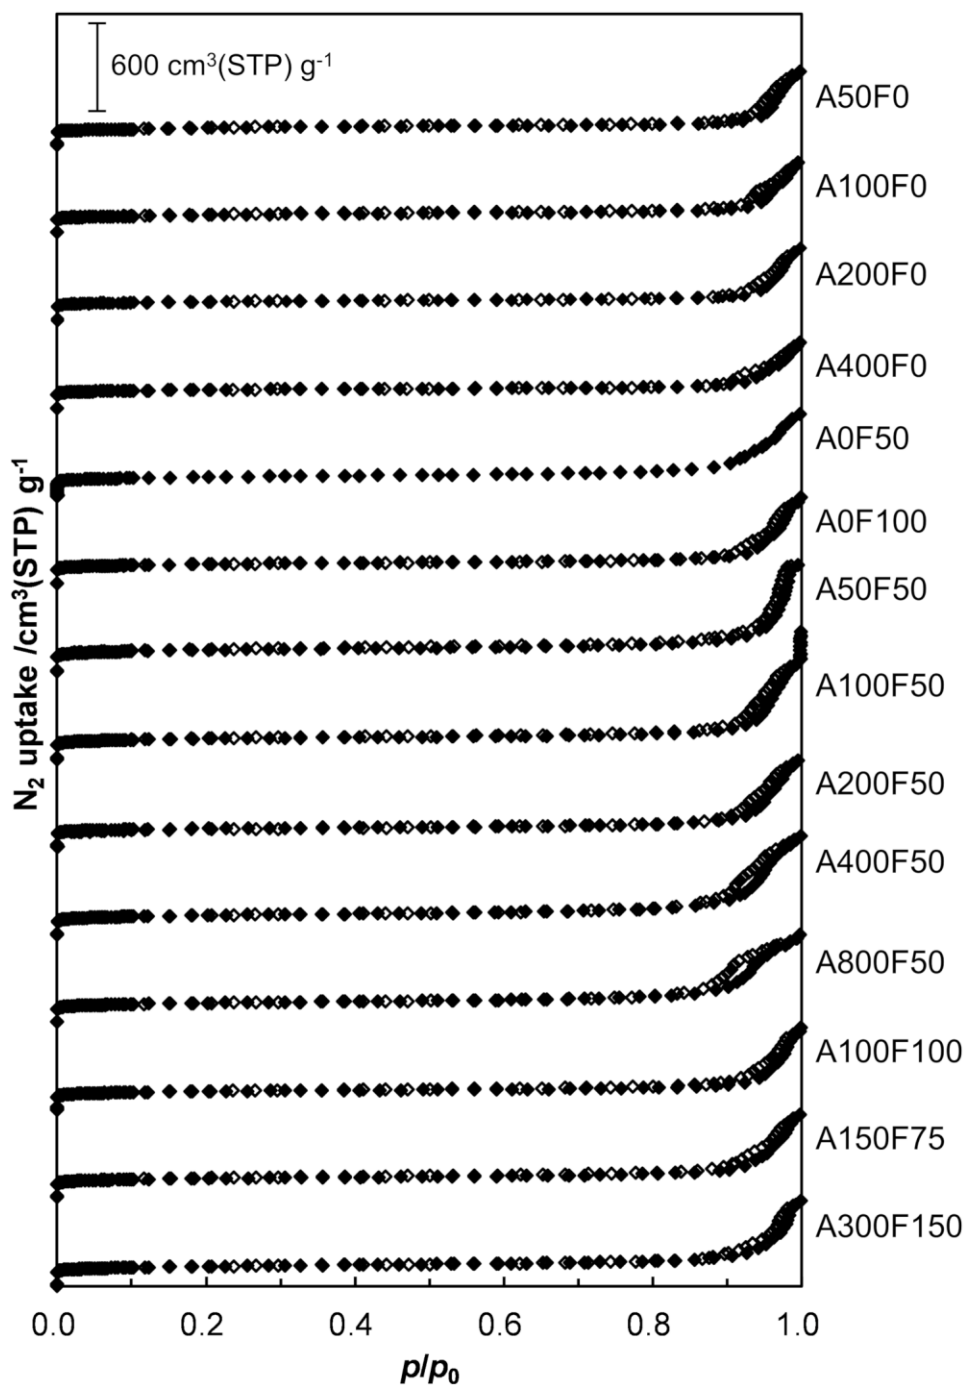

**Fig. S1**  $N_2$  physisorption isotherms of the synthesized MFI zeolites, recorded at  $-196\text{ }^\circ\text{C}$ . For ease of viewing, each isotherm has been shifted vertically. Closed dots show the adsorption branches and open dots represent the desorption branches.

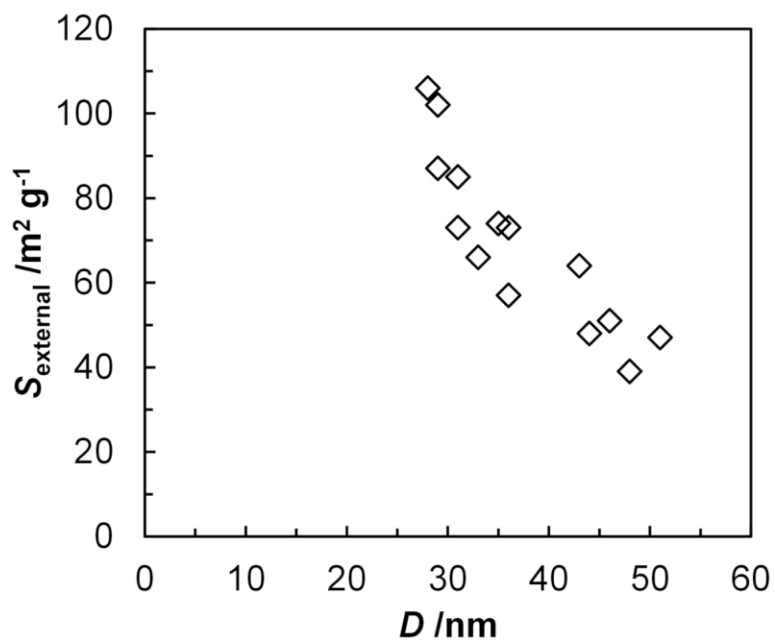

**Fig. S2** Parametric plot of external surface area determined by the  $t$ -plot method ( $S_{\text{external}}$ ) as a function of the crystallite size ( $D$ ).

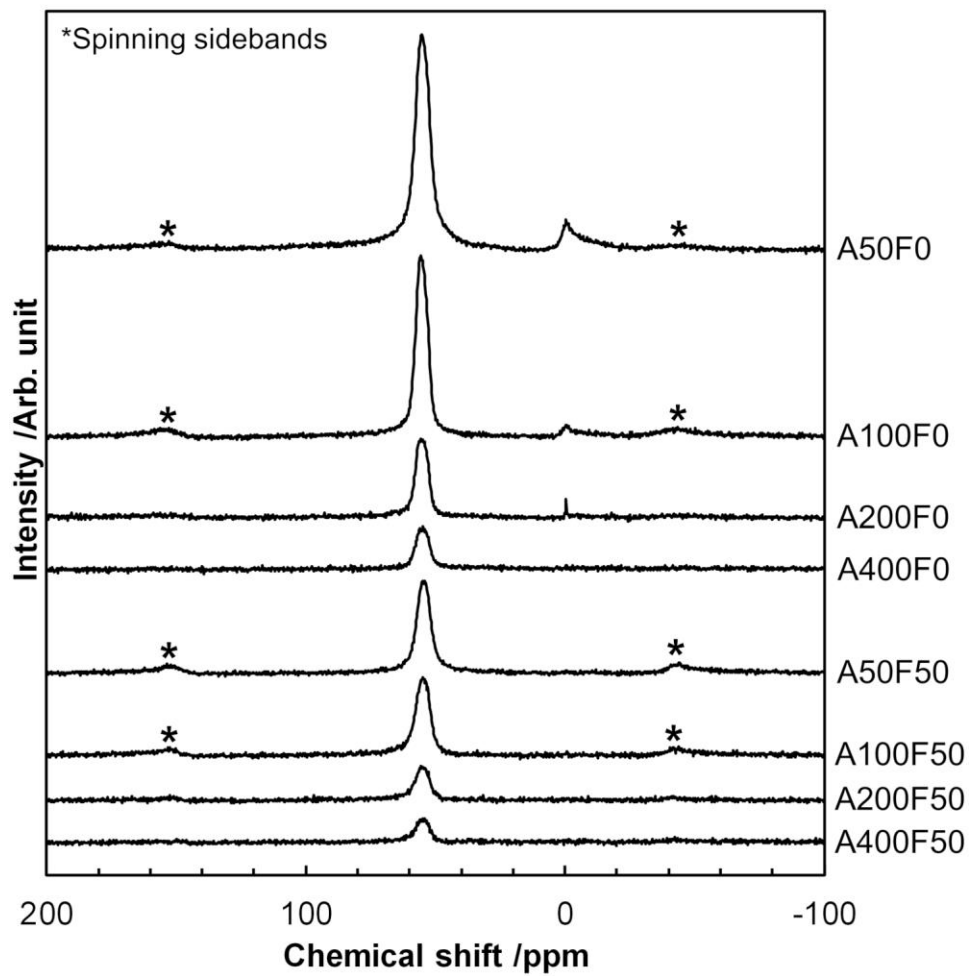

**Fig. S3**  $^{27}\text{Al}$  MAS NMR spectra of the synthesized MFI zeolites.

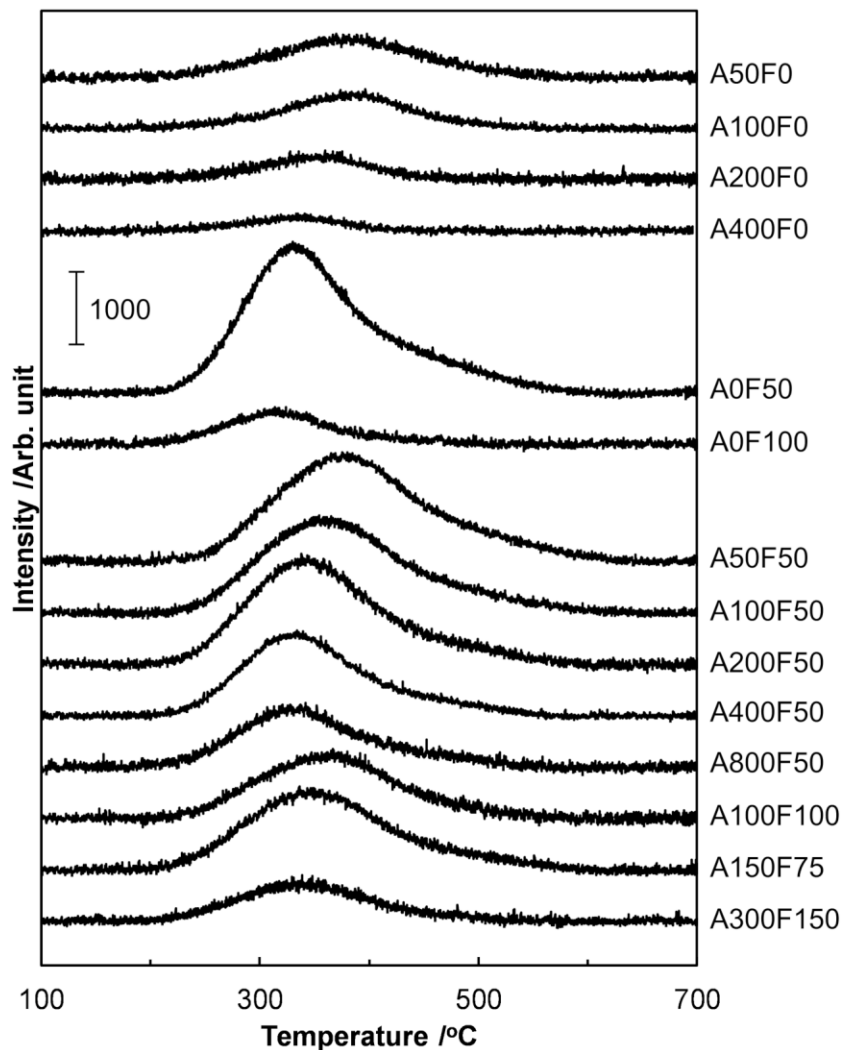

**Fig. S4** NH<sub>3</sub>-TPD profiles of the synthesized MFI zeolites, recorded by Q-MS at  $m/z = 16$ . These data were recorded after the surface saturation by NH<sub>3</sub> and the subsequent water-vapor treatment at 100 °C to remove the weakly-adsorbed NH<sub>3</sub> species.<sup>S1</sup>

The enthalpy change upon NH<sub>3</sub> desorption ( $\Delta H_{\text{NH}_3}$ ) was calculated from Fig. S4 and Eq. S1.<sup>S2</sup>

$$\ln T_m - \ln \left( \frac{A_0 W}{F} \right) = \frac{\Delta H_{\text{NH}_3}}{RT_m} + \ln \left( \frac{\beta (1 - \theta_m)^2 (\Delta H_{\text{NH}_3} - RT_m)}{p_0 e^{\frac{\Delta S_{\text{NH}_3}}{R}}} \right) \quad (\text{S1})$$

Here,  $T_m$  is the NH<sub>3</sub>-desorption temperature (unit: K),  $A_0$  is the acid density (mol kg<sup>-1</sup>),  $W$  is the sample amount (kg),  $F$  is the gas flow rate ( $= 1.0 \times 10^{-6} \text{ m}^3 \text{ s}^{-1}$ ),  $R$  is the gas constant ( $= 8.314 \text{ J K}^{-1} \text{ mol}^{-1}$ ),  $\beta$  is the temperature ramp rate ( $= 0.1667 \text{ K s}^{-1}$ ),  $\theta_m$  is the coverage of acid sites by NH<sub>3</sub> (dimensionless number),  $p_0$  is the standard pressure ( $= 1.0 \times 10^5 \text{ Pa}$ ), and  $\Delta S_{\text{NH}_3}$  is the entropy change upon NH<sub>3</sub> desorption ( $= 150 \text{ J K}^{-1}$ ).

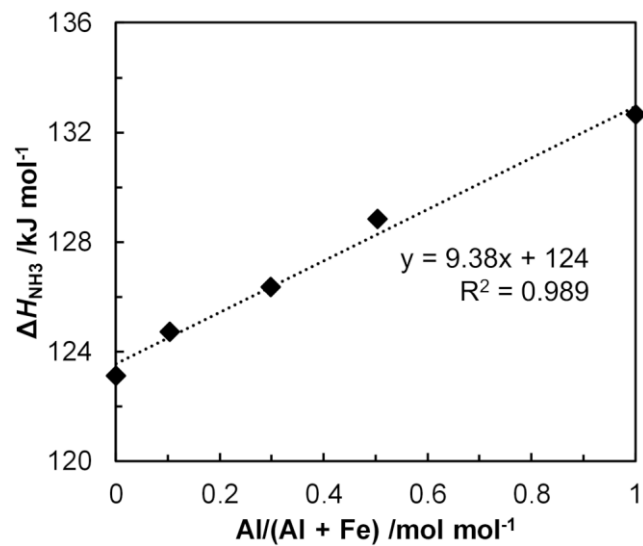

**Fig. S5** Parametric plot of the apparent  $\Delta H_{\text{NH}_3}$  for physical mixture of A50F0 and A0F50 at the different mixing ratios as a function of the proportion of Al in the total amount of Al and Fe. The values of  $\Delta H_{\text{NH}_3}$  were estimated by following the previously reported procedure (*vide supra*).<sup>S2</sup>

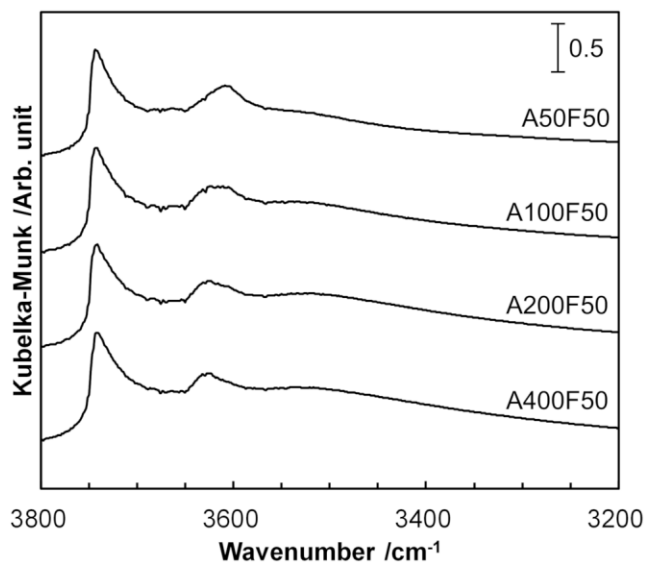

**Fig. S6** DRIFT spectra of the [Al, Fe]-MFI zeolites.

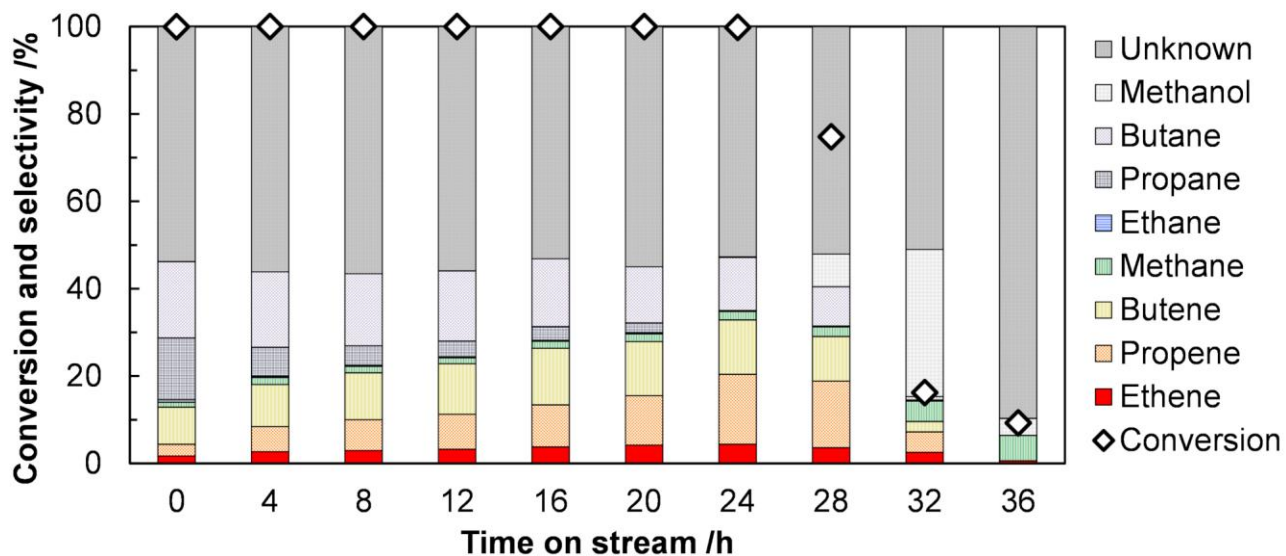

**Fig. S7** Detailed data of the DTO reaction using A50F0. Reaction conditions: A50F0 200 mg (mixed with 840 mg of quartz sand); 450 °C;  $W/F = 5.8 \text{ g h mol}^{-1}$ .

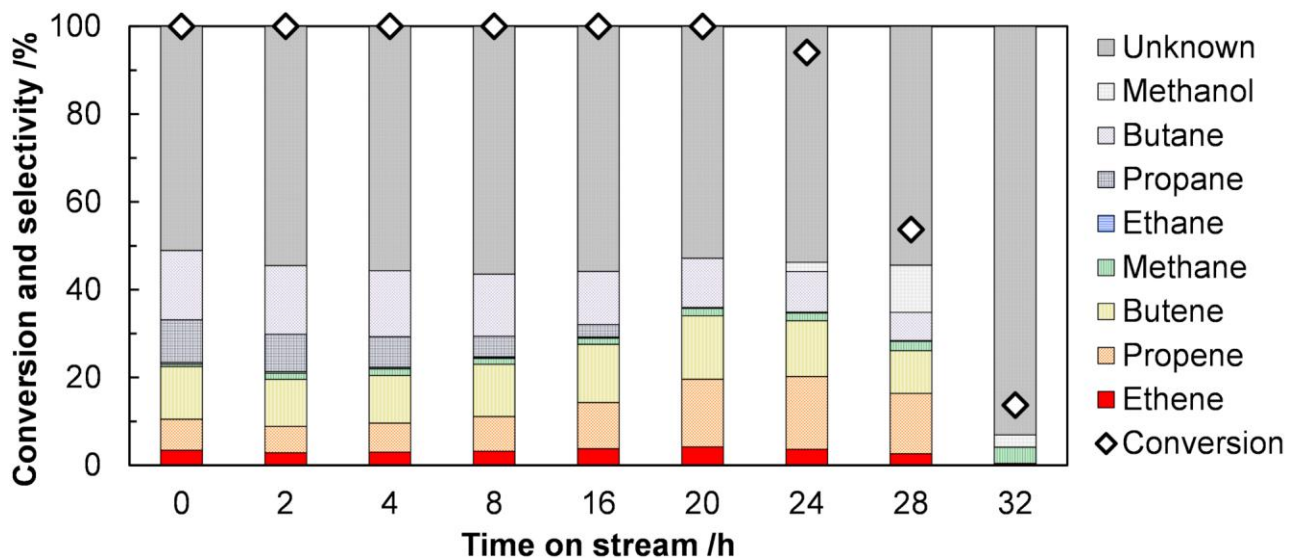

**Fig. S8** Detailed data of the DTO reaction using A100F0. Reaction conditions: A100F0 200 mg (mixed with 840 mg of quartz sand); 450 °C;  $W/F = 5.8 \text{ g h mol}^{-1}$ .



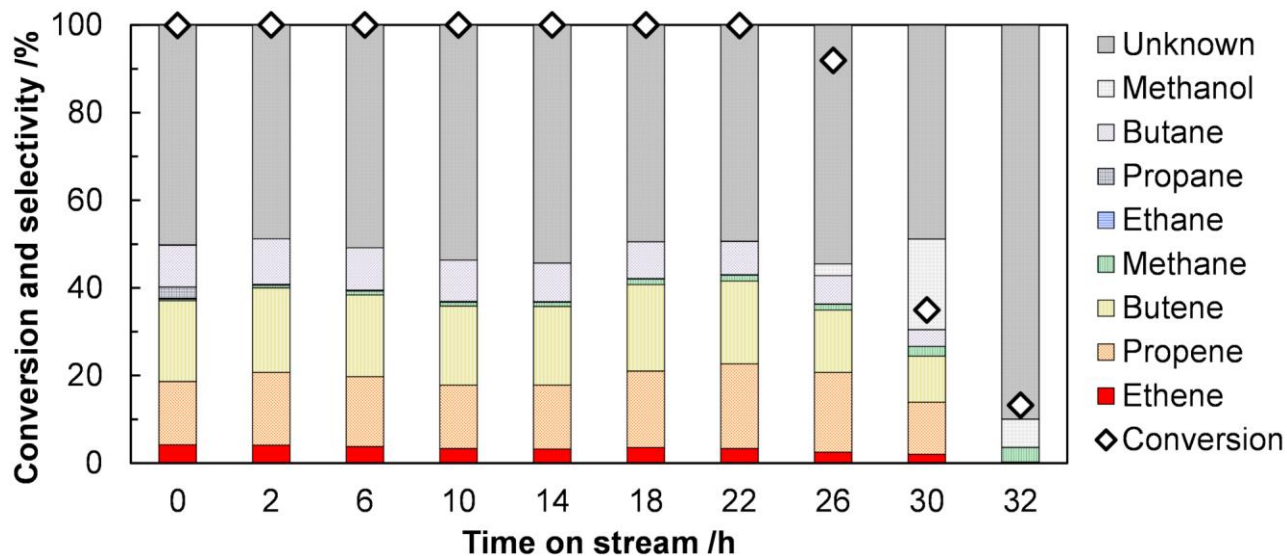

**Fig. S9** Detailed data of the DTO reaction using A200F0. Reaction conditions: A200F0 200 mg (mixed with 840 mg of quartz sand); 450 °C;  $W/F = 5.8 \text{ g h mol}^{-1}$ .

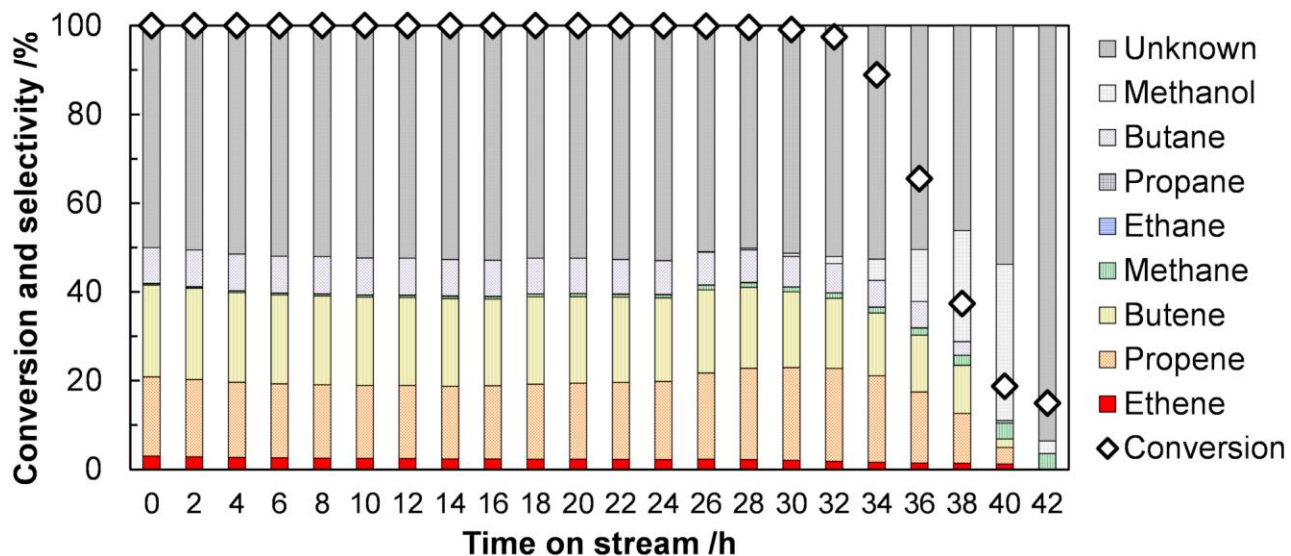

**Fig. S10** Detailed data of the DTO reaction using A400F0. Reaction conditions: A400F0 200 mg (mixed with 840 mg of quartz sand); 450 °C;  $W/F = 5.8 \text{ g h mol}^{-1}$ .

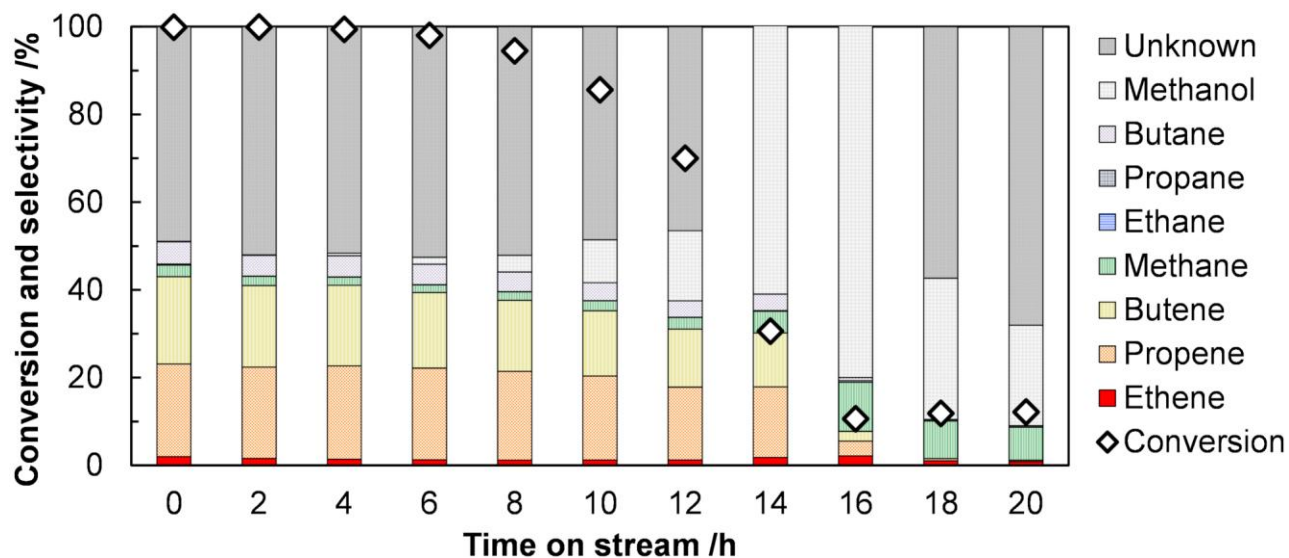

**Fig. S11** Detailed data of the DTO reaction using A0F50. Reaction conditions: A0F50 200 mg (mixed with 840 mg of quartz sand); 450 °C;  $W/F = 5.8 \text{ g h mol}^{-1}$ .

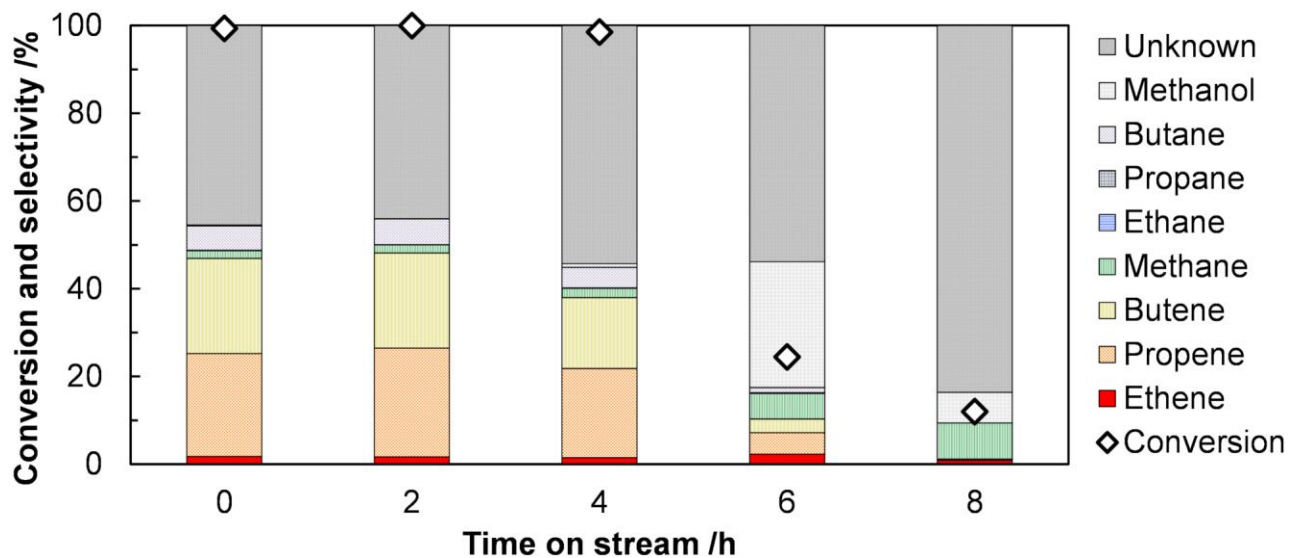

**Fig. S12** Detailed data of the DTO reaction using A0F100. Reaction conditions: A0F100 200 mg (mixed with 840 mg of quartz sand); 450 °C;  $W/F = 5.8 \text{ g h mol}^{-1}$ .

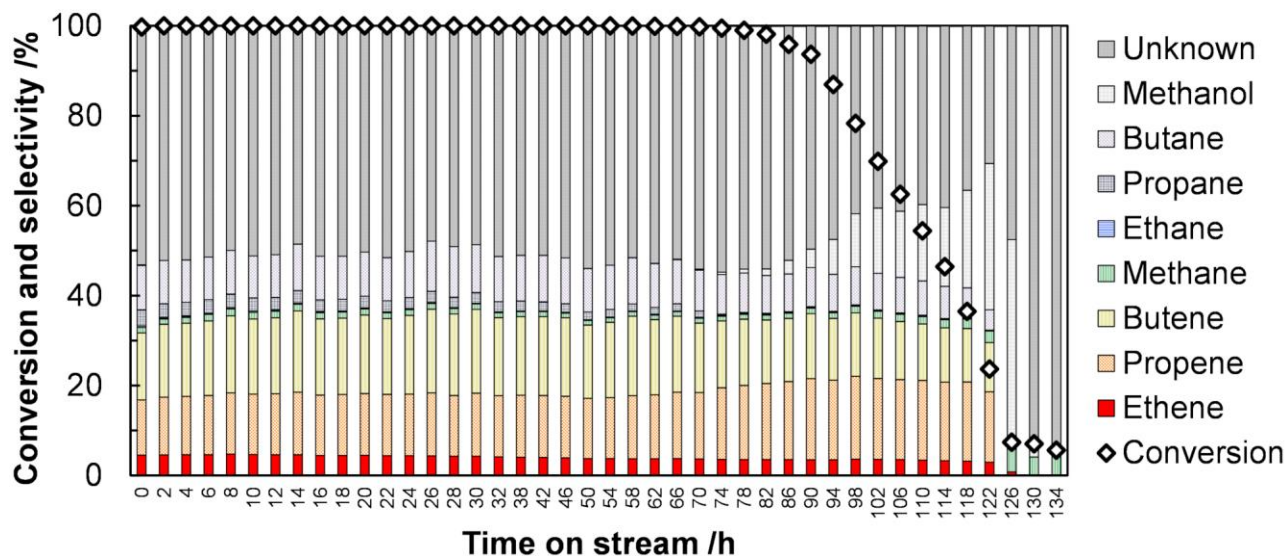

**Fig. S13** Detailed data of the DTO reaction using A50F50. Reaction conditions: A50F50 200 mg (mixed with 840 mg of quartz sand); 450 °C;  $W/F = 5.8 \text{ g h mol}^{-1}$ .

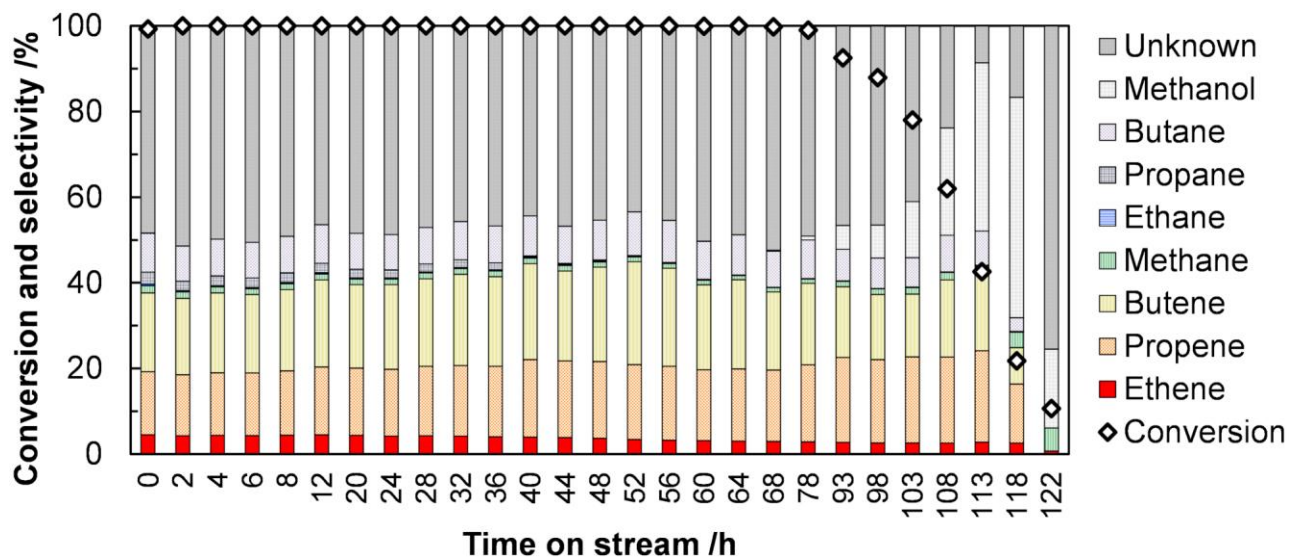

**Fig. S14** Detailed data of the DTO reaction using A100F50. Reaction conditions: A100F50 200 mg (mixed with 840 mg of quartz sand); 450 °C;  $W/F = 5.8 \text{ g h mol}^{-1}$ .

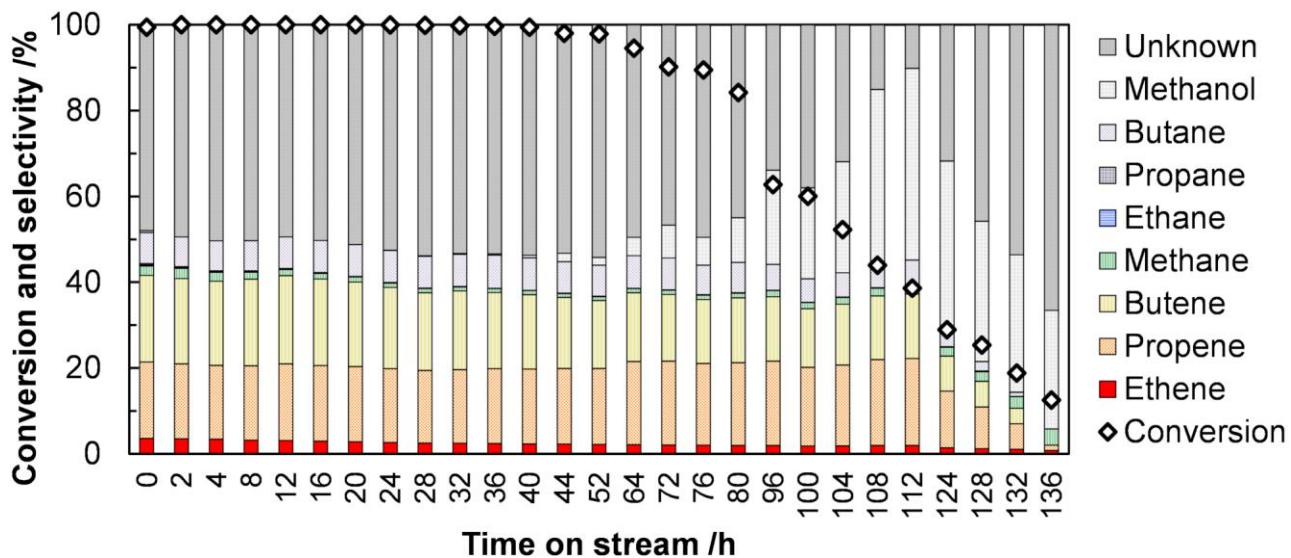

**Fig. S15** Detailed data of the DTO reaction using A200F50. Reaction conditions: A200F50 200 mg (mixed with 840 mg of quartz sand); 450 °C;  $W/F = 5.8 \text{ g h mol}^{-1}$ .

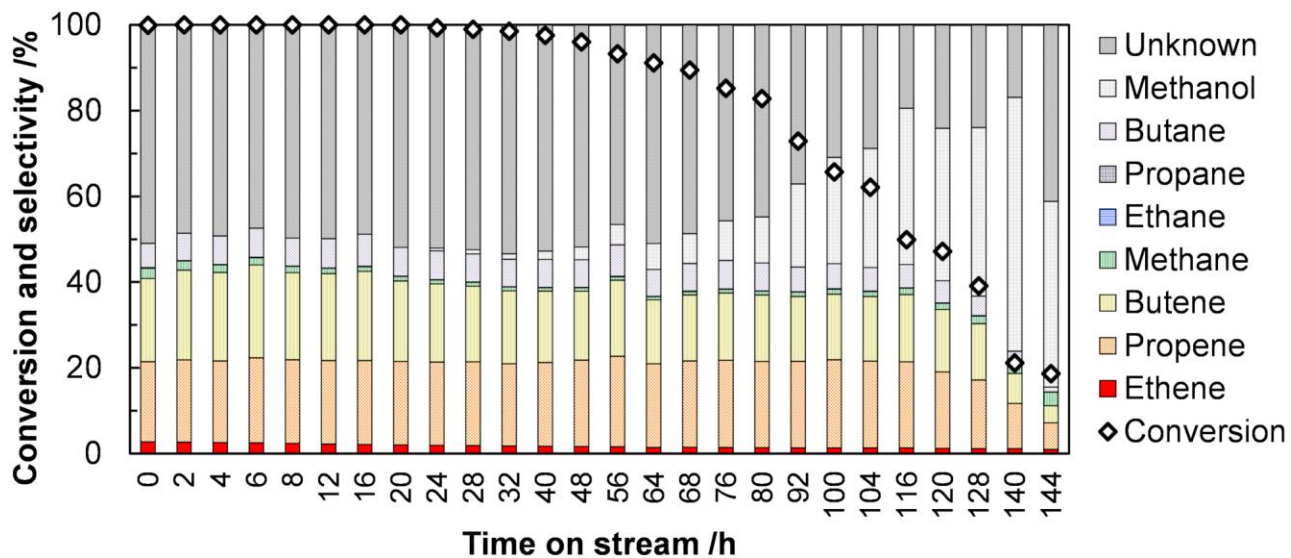

**Fig. S16** Detailed data of the DTO reaction using A400F50. Reaction conditions: A400F50 200 mg (mixed with 840 mg of quartz sand); 450 °C;  $W/F = 5.8 \text{ g h mol}^{-1}$ .

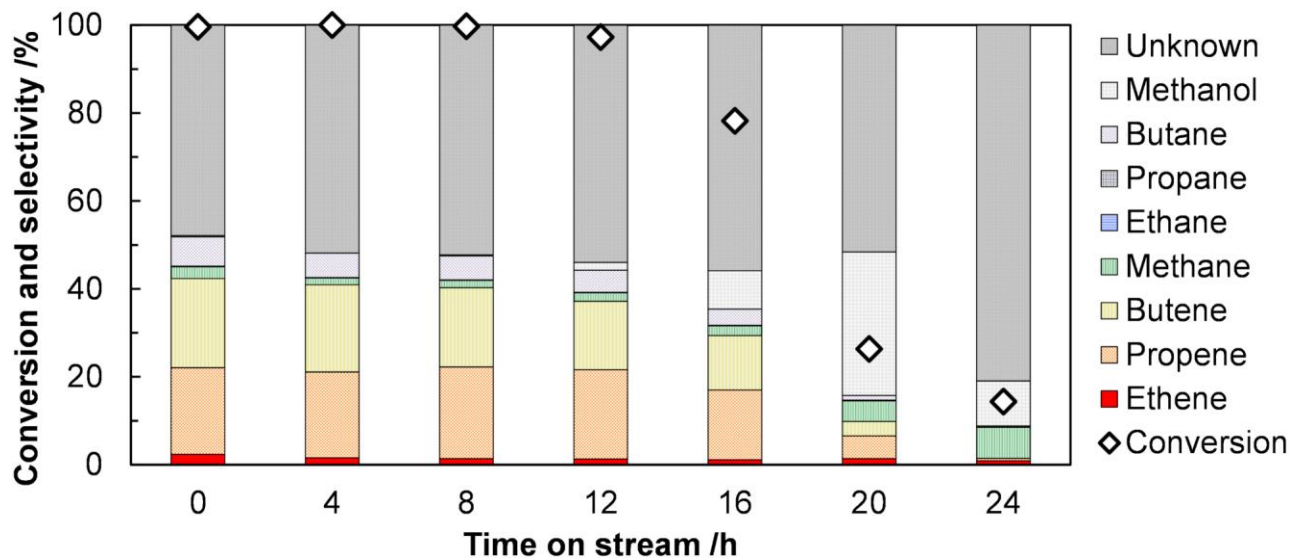

**Fig. S17** Detailed data of the DTO reaction using A800F50. Reaction conditions: A800F50 200 mg (mixed with 840 mg of quartz sand); 450 °C;  $W/F = 5.8 \text{ g h mol}^{-1}$ .

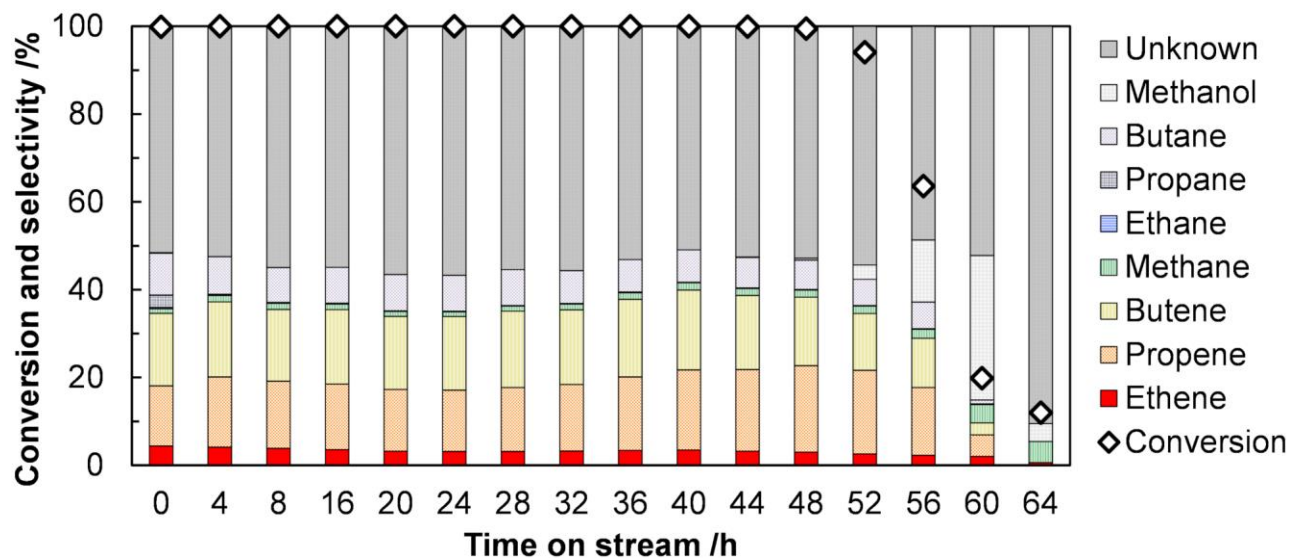

**Fig. S18** Detailed data of the DTO reaction using A100F100. Reaction conditions: A100F100 200 mg (mixed with 840 mg of quartz sand); 450 °C;  $W/F = 5.8 \text{ g h mol}^{-1}$ .

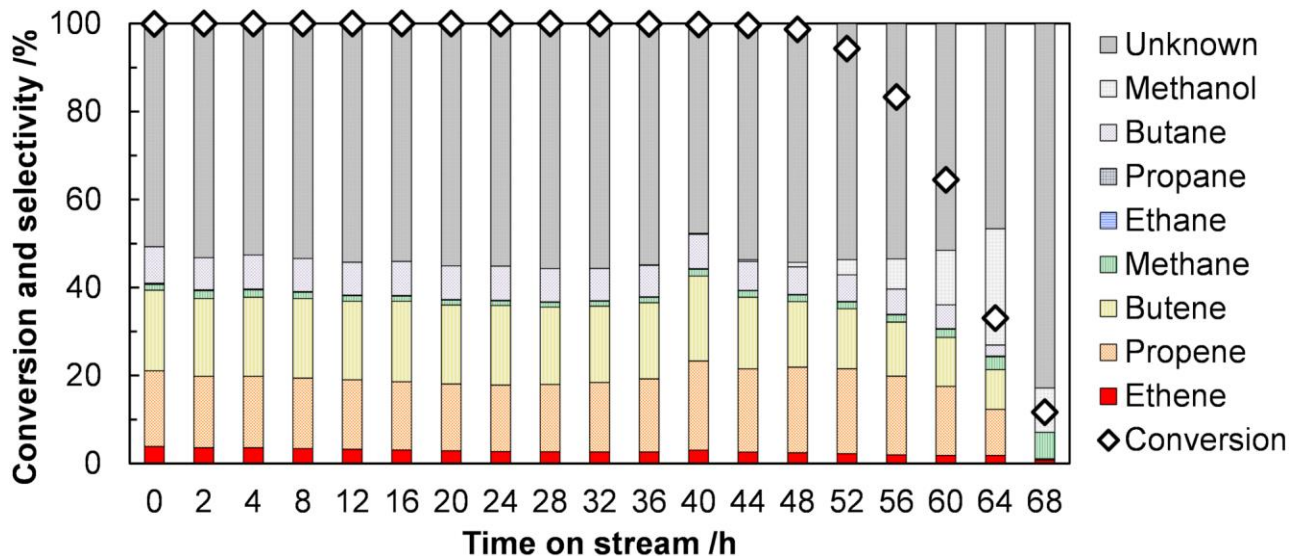

**Fig. S19** Detailed data of the DTO reaction using A150F75. Reaction conditions: A150F75 200 mg (mixed with 840 mg of quartz sand); 450 °C;  $W/F = 5.8 \text{ g h mol}^{-1}$ .

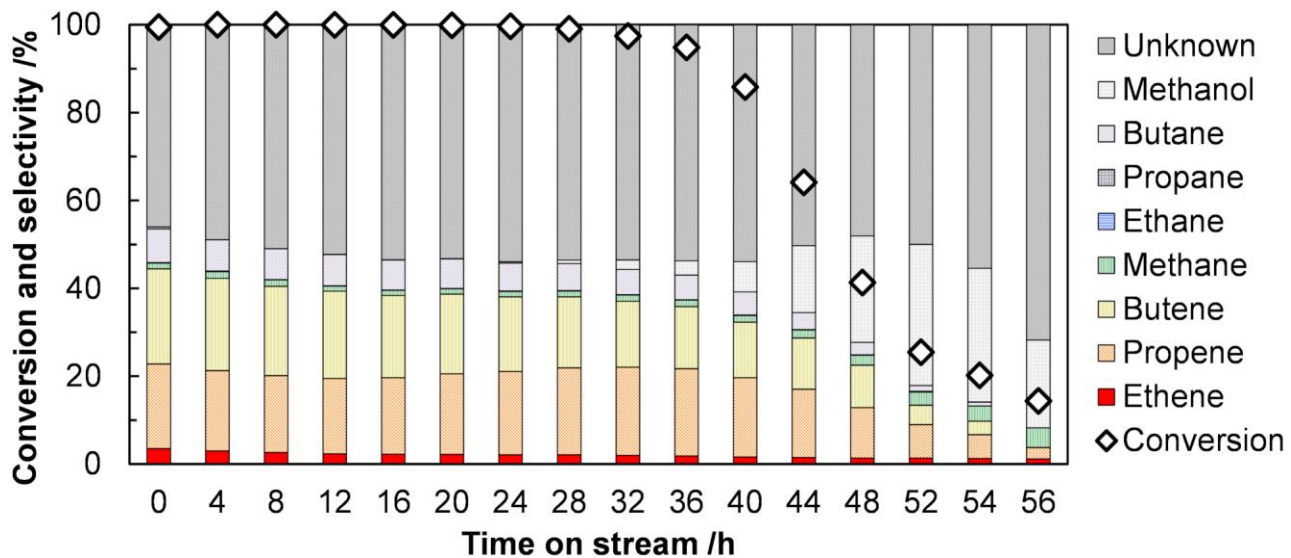

**Fig. S20** Detailed data of the DTO reaction using A300F150. Reaction conditions: A300F150 200 mg (mixed with 840 mg of quartz sand); 450 °C;  $W/F = 5.8 \text{ g h mol}^{-1}$ .

**Table S1** Ratios of propene to ethene produced in the DTO reaction

| Catalyst | Ratio of propene to ethene <sup>a</sup> |
|----------|-----------------------------------------|
| A50F0    | 2.7                                     |
| A100F0   | 3.1                                     |
| A200F0   | 4.8                                     |
| A400F0   | 8.0                                     |
| A0F50    | 15                                      |
| A0F100   | 14                                      |
| A50F50   | 3.7                                     |
| A100F50  | 4.9                                     |
| A200F50  | 7.5                                     |
| A400F50  | 11                                      |
| A800F50  | 13                                      |
| A100F100 | 5.0                                     |
| A150F75  | 6.2                                     |
| A300F150 | 8.6                                     |

<sup>a</sup> The value was calculated by averaging the data at the conversion of >50%.

**Table S2** Reported catalysts for the DTO reaction

| Catalyst                                                                            | Temp.<br>/°C | GHSV<br>or $W/F^a$                      | DME<br>conv. /% | Light olefin<br>selec. /% | Lifetime <sup>b</sup><br>/h | Ref. |
|-------------------------------------------------------------------------------------|--------------|-----------------------------------------|-----------------|---------------------------|-----------------------------|------|
| H <sub>3</sub> PO <sub>4</sub> /12.5 wt% ZrO <sub>2</sub> /<br>H-ZSM-5 (Si/Al = 42) | 450          | 10 g h mol <sup>-1</sup>                | 100             | 63.1                      | N/A <sup>c</sup>            | S3   |
| SAPO-34 <sup>d</sup>                                                                | 450          | 2.85 h <sup>-1 e</sup>                  | 100             | 80–90                     | 15                          | S4   |
| CeO <sub>2</sub> -modified Ca-MFI<br>(Si/Al = 100, Ca/Si = 0.025)                   | 530          | 9.52 h <sup>-1 e</sup>                  | >99             | 45 <sup>f</sup>           | 250                         | S5   |
| H-ZSM-5, partially<br>ion-exchanged with Ca<br>(Si/Al = 350)                        | 530          | 1000 h <sup>-1</sup>                    | 100             | 63.9                      | 146 <sup>c</sup>            | S6   |
| 11 wt% SAPO-34/ZrO <sub>2</sub>                                                     | 400          | 3.54 h <sup>-1 e</sup>                  | 100             | 80.5                      | 470                         | S7   |
| SAPO-34                                                                             | 460          | 0.72 h <sup>-1</sup>                    | 99.8            | 78.8                      | 7                           | S8   |
| Phosphate-loaded<br>MCM-68 (Si/Al = 60)                                             | 400          | 10.0 g h mol <sup>-1</sup>              | 96.7            | 69.8                      | N/A <sup>g</sup>            | S9   |
| CeO <sub>2</sub> -modified dealuminated<br>MCM-68 (Si/Al = 110)                     | 400          | 20 g h mol <sup>-1</sup>                | >99             | 70                        | N/A <sup>g</sup>            | S10  |
| Mixture of RHO and<br>SAPO-34 <sup>h</sup>                                          | 400          | 3000 mL g <sup>-1</sup> h <sup>-1</sup> | >99             | 90.2                      | 6.3                         | S11  |
| Hierarchical SAPO-34<br>(Si/Al = 0.18, Si/P = 0.23)                                 | 400          | 3 h <sup>-1 e</sup>                     | >99             | 80 <sup>i</sup>           | 7.9                         | S12  |
| Nano-sized<br>hierarchical ZSM-5<br>(Si/Al = 36)                                    | 400          | 1.8 h <sup>-1</sup>                     | >99             | 50.3                      | 110 <sup>j</sup>            | S13  |

<sup>a</sup> Gas hourly space velocity (GHSV, unit: h<sup>-1</sup>) or contact time ( $W/F$ , unit: g h mol<sup>-1</sup>). <sup>b</sup> The lifetime was defined as the time when the DME conversion became below 50%, unless otherwise noted. <sup>c</sup> At least 30 h. <sup>d</sup> Fluidized-bed reactor. <sup>e</sup> Weight hourly space velocity (WHSV). <sup>f</sup> Propene selectivity. <sup>g</sup> At least 5 h. <sup>h</sup> The DTO reaction was operated under the pressurized conditions (1.5 MPa). <sup>i</sup> Ethene and propene. <sup>j</sup> The lifetime was defined as the time when the conversion was 100%.



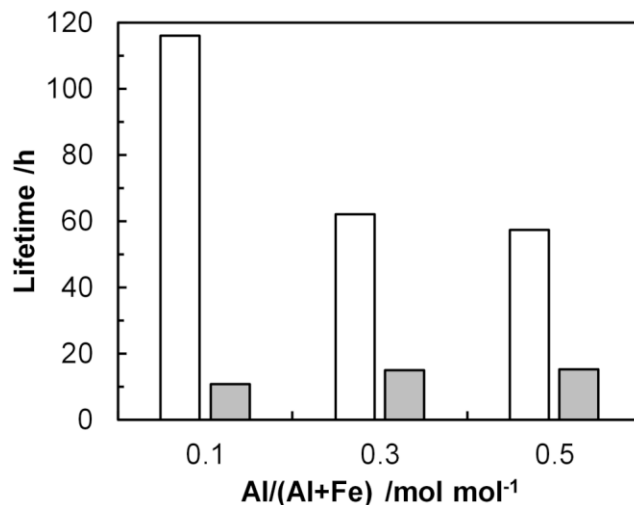

**Fig. S21** Differences of catalyst lifetime in the DTO reactions between [Al, Fe]-MFI (white bars) and a physical mixture of A50F0 and A0F50 (gray bars) at the various Al/(Al + Fe) values. Catalyst lifetime is defined as the time when the DME conversion becomes lower than 50%. Reaction conditions: catalyst 200 mg (mixed with 840 mg of quartz sand); 450 °C;  $W/F = 5.8 \text{ g h mol}^{-1}$ .

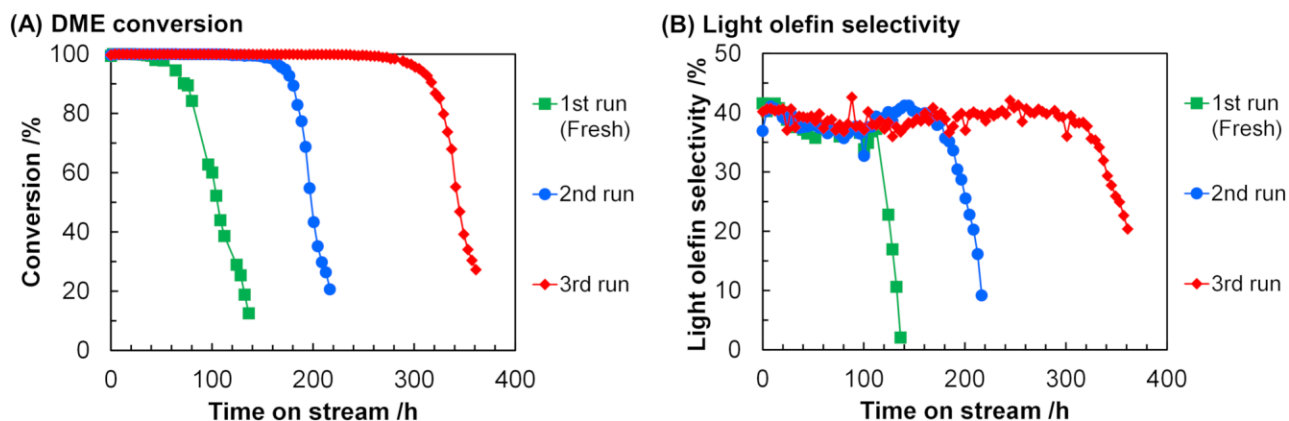

**Fig. S22** Recycle test of A200F50 for the DTO reaction. Before the second and third run, the catalyst was regenerated via calcination at 550 °C for 6 h in air. The data of the first run is the same as the one shown in Fig. 5. Reaction conditions: catalyst 200 mg (mixed with 840 mg of quartz sand); 450 °C;  $W/F = 5.8 \text{ g h mol}^{-1}$ .

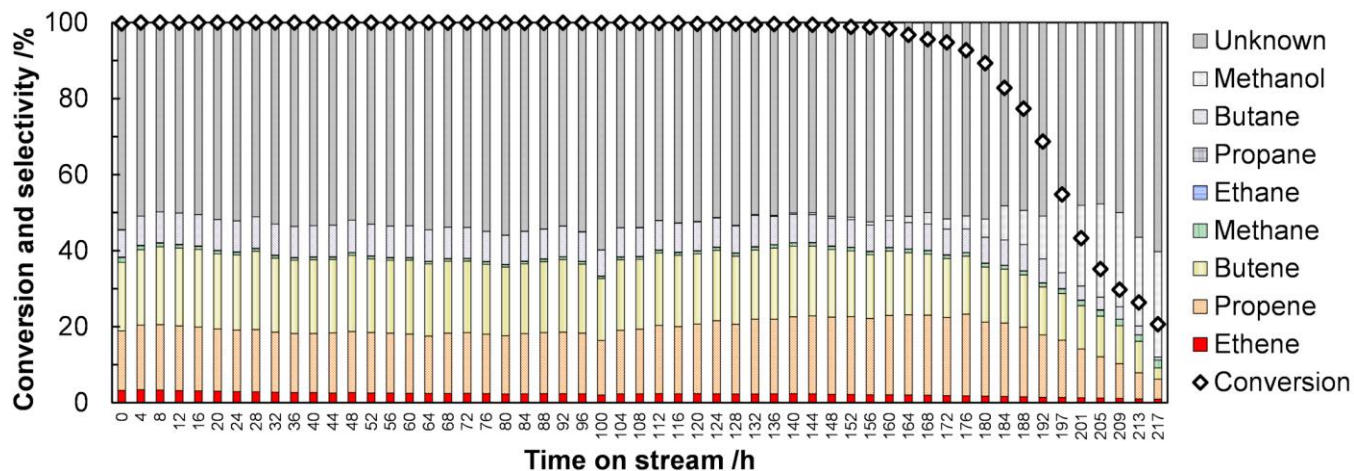

**Fig. S23** Detailed data of the second run of the DTO reaction using A200F50. Reaction conditions: A200F50 200 mg (mixed with 840 mg of quartz sand); 450 °C;  $W/F = 5.8 \text{ g h mol}^{-1}$ .

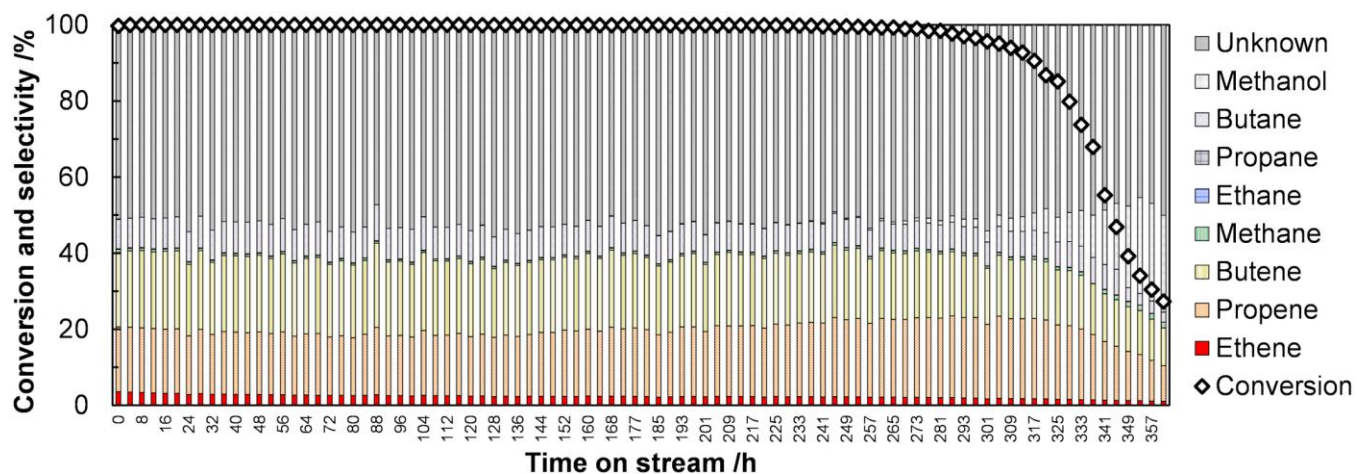

**Fig. S24** Detailed data of the third run of the DTO reaction using A200F50. Reaction conditions: A200F50 200 mg (mixed with 840 mg of quartz sand); 450 °C;  $W/F = 5.8 \text{ g h mol}^{-1}$ .

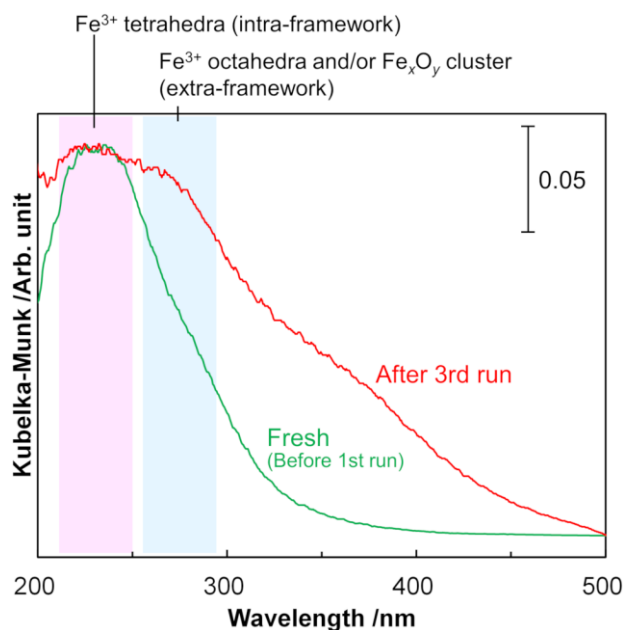

**Fig. S25** Differences of the nature of Fe species involved in the fresh A200F50 catalyst and the one after the third run of recycle test.

### Supplementary references

- S1 G. Bagnasco, *J. Catal.*, 1996, **159**, 249–252.
- S2 M. Niwa, N. Katada, M. Sawa and Y. Murakami, *J. Phys. Chem.*, 1995, **99**, 8812–8816.
- S3 T.-S. Zhao, T. Takemoto and N. Tsubaki, *Catal. Commun.*, 2006, **7**, 647–650.
- S4 Y. Chen, H. Zhou, J. Zhu, Q. Zhang, Y. Wang, D. Wang and F. Wei, *Catal. Lett.*, 2008, **124**, 297–303.
- S5 A. Iida, R. Nakamura, K. Komura and Y. Sugi, *Chem. Lett.*, 2008, **37**, 494–495.
- S6 K. Omata, Y. Yamazaki, Y. Watanabe, K. Kodama and M. Yamada, *Ind. Eng. Chem. Res.*, 2009, **48**, 6256–6261.
- S7 S.-G. Lee, H.-S. Kim, Y.-H. Kim, E.-J. Kang, D.-H. Lee and C.-S. Park, *J. Ind. Eng. Chem.*, 2014, **20**, 61–67.
- S8 M. Ghavipour, R. M. Behbahani, R. B. Rostami and A. S. Lemraski, *J. Nat. Gas Sci. Eng.*, 2014, **21**, 532–539.
- S9 S. Park, S. Inagaki and Y. Kubota, *Catal. Today*, 2016, **265**, 218–224.
- S10 Q. Han, K. Enoeda, S. Inagaki and Y. Kubota, *Chem. Lett.*, 2017, **46**, 1434–1437.
- S11 F. Wang, Z. Wen, Z. Qin, Q. Fang, Q. Ge, Z. Li, J. Sun and G. Li, *Fuel*, 2019, **244**, 104–109.
- S12 S. Zhang, Z. Wen, L. Yang, C. Duan, X. Lu, Y. Song, Q. Ge and Y. Fang, *Micropor. Mesopor. Mater.*, 2019, **274**, 220–226.
- S13 Z. Chen, Z. Li, Y. Zhang, D. Chevella, G. Li, Y. Chen, X. Guo, J. Liu and J. Yu, *Chem. Eng. J.*, 2020, **388**, 124322.
